# Supplementary material for: Understanding the effect of interaction among aeration, agitation and impeller positions on mass transfer during pullulan fermentation by Aureobasidium pullulans
Source: Royal Society of Chemistry journal article supplement (doi:10.1039/c5ra03715h), 2015-01-01
Supplement: c5ra03715h1.pdf [file c5ra03715h1.pdf]

**Supplementary Table 1** Change in viscosity during pullulan production at different  $k_{La}$  conditions

| Time (hours) | Viscosity (cP)<br>at 1.99 $k_{La}$ | Viscosity (cP)<br>at 1.4 $k_{La}$ | Viscosity (cP)<br>at 1.1 $k_{La}$ | Viscosity (cP)<br>at 0.29 $k_{La}$ | Viscosity (cP)<br>at 0.28 $k_{La}$ |
|--------------|------------------------------------|-----------------------------------|-----------------------------------|------------------------------------|------------------------------------|
| 0            | 1.2                                | 1.18                              | 1.23                              | 1.1                                | 1.1                                |
| 8            | 3.14                               | 3.74                              | 2.63                              | 1.69                               | 1.25                               |
| 16           | 9.24                               | 8.65                              | 6.67                              | 2.03                               | 1.99                               |
| 24           | 15.04                              | 12.13                             | 8.58                              | 4.02                               | 3.68                               |
| 32           | 20.52                              | 13.5                              | 10.5                              | 4.90                               | 4.63                               |
| 40           | 22.88                              | 17.12                             | 14.69                             | 5.44                               | 5.32                               |
| 46           | 25.95                              | 20.43                             | 16.41                             | 5.82                               | 5.76                               |
